# Supplementary material for: Immobilization of heavy metals in tannery sludge by the formation of tobermorite in subcritical water treatment with rice husk silica
Source: Royal Society of Chemistry journal article supplement (doi:10.1039/d3ra00595j), 2023-01-01
Supplement: d3ra00595j1.pdf [file d3ra00595j1.pdf]

## **Immobilization of heavy metals in tannery sludge by the formation of tobermorite in subcritical water treatment with rice husk silica**

Ayesha Akter<sup>a,b</sup>, Masafumi Goto<sup>a\*\*</sup>, Megat Johari Megat Mohd Noor<sup>a</sup>, Ahmed Parvez<sup>c</sup>, Shamsunnahar Khanam<sup>d</sup>, Md. Abu Bakar Siddique<sup>e</sup>, Md Faysal Hossain<sup>f</sup>, Tapos Kormoker<sup>b\*</sup>

<sup>a</sup>Malaysia Japan International Institute of Technology, Universiti Teknologi Malaysia KL Campus, Jalan Sultan Yahya Petra 54100, Kuala Lumpur, Malaysia

<sup>b</sup>Department of Emergency Management, Faculty of Environmental Science and Disaster Management, Patuakhali Science and Technology University, Dumki, Patuakhali-8602, Bangladesh

<sup>c</sup>Department of Environmental Science, Faculty of Environmental Science and Disaster Management, Patuakhali Science and Technology University, Dumki, Patuakhali-8602, Bangladesh

<sup>d</sup>Department of Environmental Science, Bangladesh University of Professionals, Dhaka, Bangladesh

<sup>e</sup>Institute of National Analytical Research and Service (INARS), Bangladesh Council of Scientific and Industrial Research (BCSIR), Dhanmondi, Dhaka 1205, Bangladesh

<sup>f</sup>State Environmental Protection Key Laboratory of Environmental Risk Assessment and Control on Chemical Process, East China University of Science and Technology, No. 130, Meilong Road, Shanghai, 200237, China

### **\*Corresponding author:**

E-mail: [tapos.pstu@gmail.com](mailto:tapos.pstu@gmail.com) (Tapos Kormoker)

### **\*\*Corresponding author:**

E-mail: [goto@utm.my](mailto:goto@utm.my) (Masafumi Goto)

### Supplementary Tables

**Table S1** Experimental conditions for analyzing the efficacy of SCW treatment.

| Experiment runs (code) | Amount of tannery sludge (g) | Amount of silica (g) 95% purity | Amount of Ca(OH) <sub>2</sub> (g) |
|------------------------|------------------------------|---------------------------------|-----------------------------------|
| SRC (control)          | 10                           | -                               | -                                 |
| SR200/30               | 10                           | 10.5                            | 8                                 |
| SR240/30               | 10                           | 10.5                            | 8                                 |
| SR280/30               | 10                           | 10.5                            | 8                                 |

**Table S2:** Experimental setup for the formation of tobermorite

| Experiment runs (code) | Amount of tannery sludge (g) | Amount of silica (g) 95% purity | Amount of Ca(OH) <sub>2</sub> (g) |
|------------------------|------------------------------|---------------------------------|-----------------------------------|
| SR200/60/S             | 10                           | 10.5                            | 8                                 |
| SR200/180/S            | 10                           | 10.5                            | 8                                 |
| SR200/360/S            | 10                           | 10.5                            | 8                                 |
| SR200/360/D            | 10                           | 21.0                            | 16                                |
| SR200/540/S            | 10                           | 10.5                            | 8                                 |
| SR240/180/S            | 10                           | 10.5                            | 8                                 |
| SR240/180/D            | 10                           | 21.0                            | 16                                |
| SR240/360/S            | 10                           | 10.5                            | 8                                 |
| SR240/360/D            | 10                           | 21.0                            | 16                                |
| SR280/60/S             | 10                           | 10.5                            | 8                                 |
| SR280/90/S             | 10                           | 10.5                            | 8                                 |

**Table S3** Risk assessment code (RAC) for heavy metals in tannery sludge.

| Category | $RI=(F1+F2)/total \times 100$ | Risk level     |
|----------|-------------------------------|----------------|
| 1        | < 1                           | No risk        |
| 2        | 1-10                          | Low risk       |
| 3        | 11-30                         | Medium risk    |
| 4        | 31-50                         | High risk      |
| 5        | > 50                          | Very high risk |

**Table S4** Chemical compositions of rice husk and metal oxides in rice husk ash.

| Rice husk     |              | Rice husk ash                  |              |
|---------------|--------------|--------------------------------|--------------|
| Composition   | Contents (%) | Oxides                         | Contents (%) |
| Cellulose     | 31.12        | SiO <sub>2</sub>               | 93.19        |
| Hemicellulose | 22.48        | K <sub>2</sub> O               | 3.84         |
| Lignin        | 22.34        | MgO                            | 0.87         |
| Mineral ash   | 13.87        | Al <sub>2</sub> O <sub>3</sub> | 0.78         |
| Water         | 7.86         | CaO                            | 0.74         |
| Extractives   | 2.33         | Fe <sub>2</sub> O <sub>3</sub> | 0.58         |

**Table S5** Relationship among fractions, eco-toxicity, and bioavailability of HMs [1].

| Fractions | Binding strength  | Eco-toxicity       | Bioavailability         |
|-----------|-------------------|--------------------|-------------------------|
| F1+F2     | Weakly bound      | Direct toxicity    | Bio-available           |
| F3+F4     | Relatively stable | Potential toxicity | Potential bio-available |

|    |        |             |                   |
|----|--------|-------------|-------------------|
| F5 | Stable | No toxicity | Non-bio-available |
|----|--------|-------------|-------------------|

**Supplementary Figures**

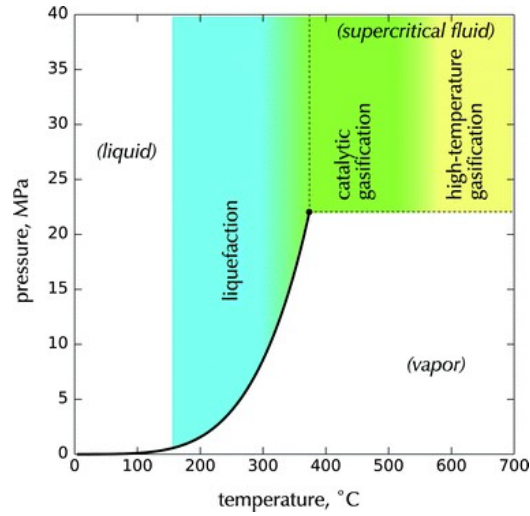

**Fig. S1** Pressure-temperature phase diagram of water [2].

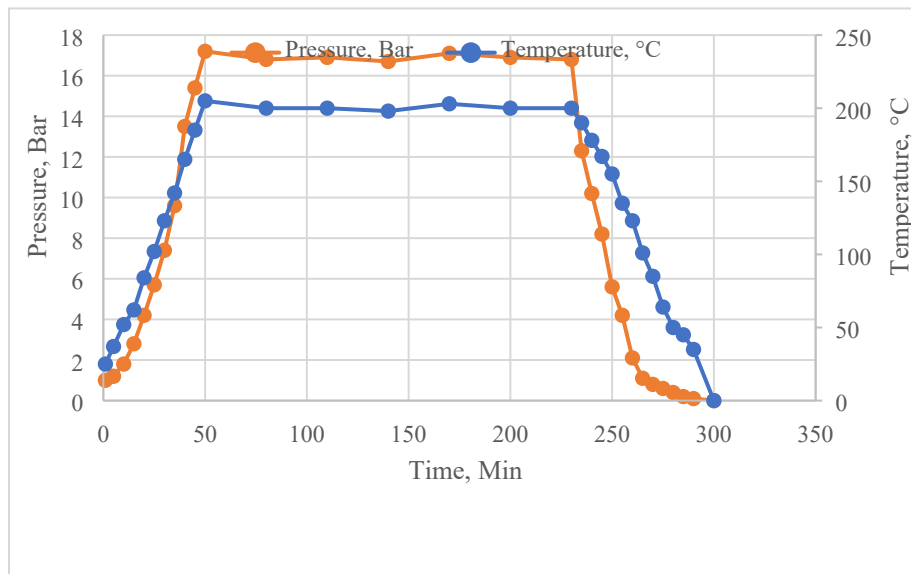

**Fig. S2.** SCW treatments pressure and temperature profile with time.

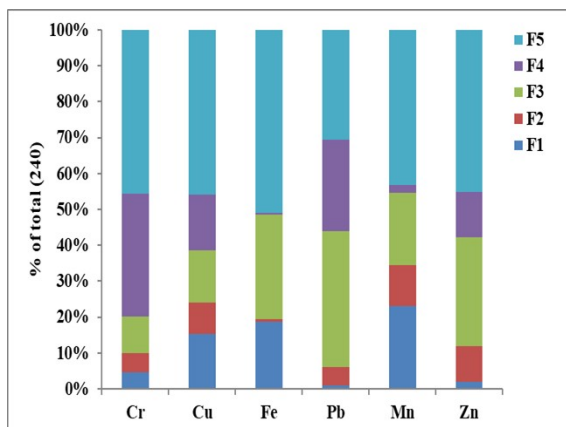

(a) 200°C for 30 min

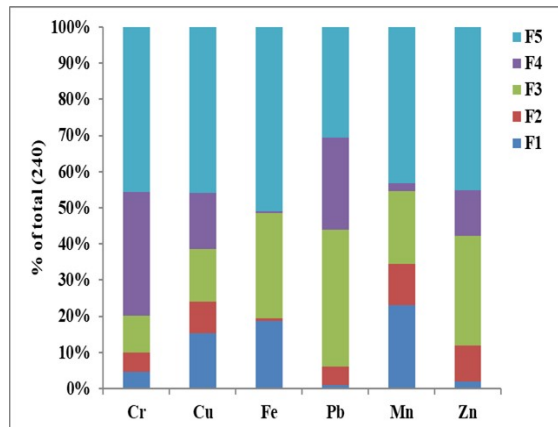

(b) 240°C for 30 min

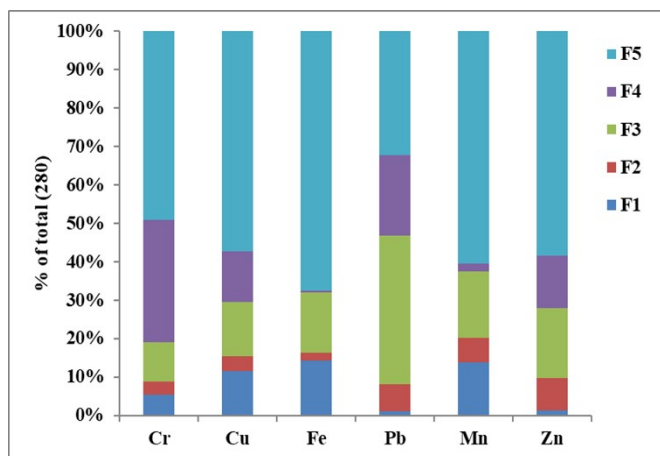

(c) 280°C for 30 min

**Fig. S3.** Fractional distribution of heavy metals in the tannery sludge SCW at 200°C, 240°C, and 280°C, for 30 min.

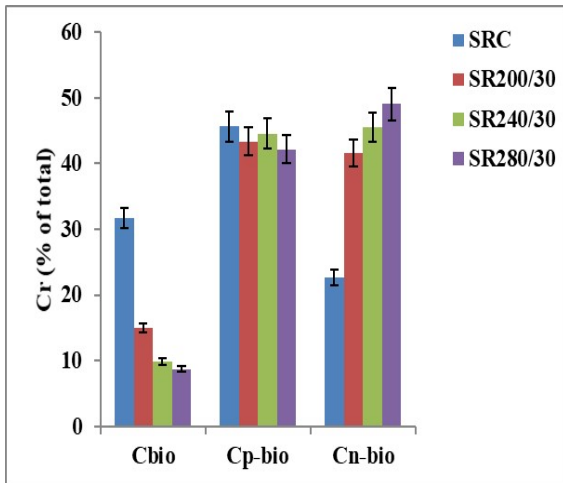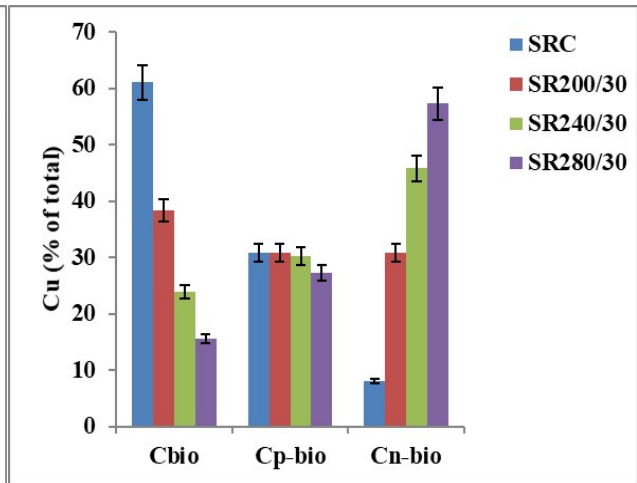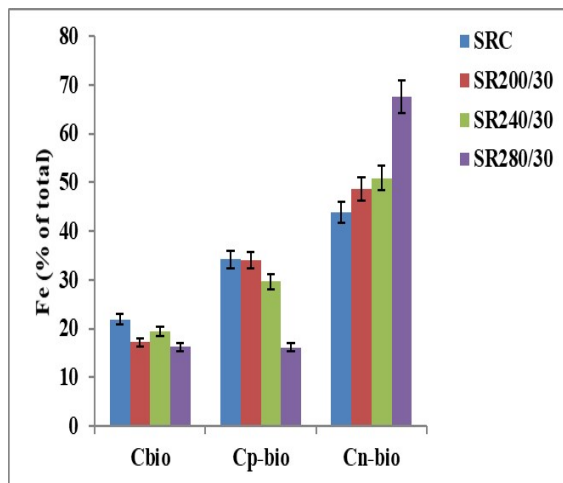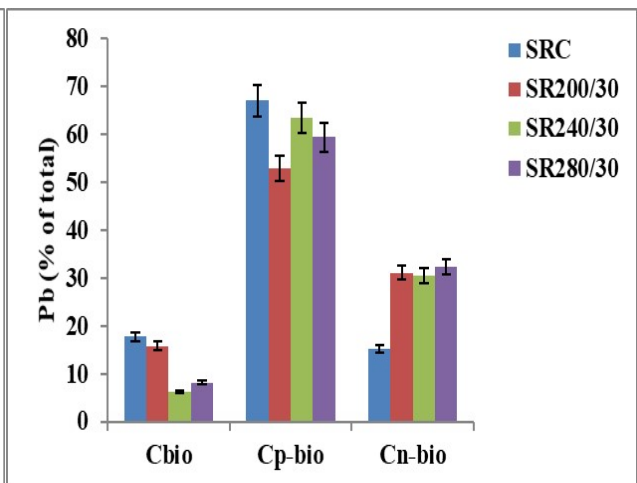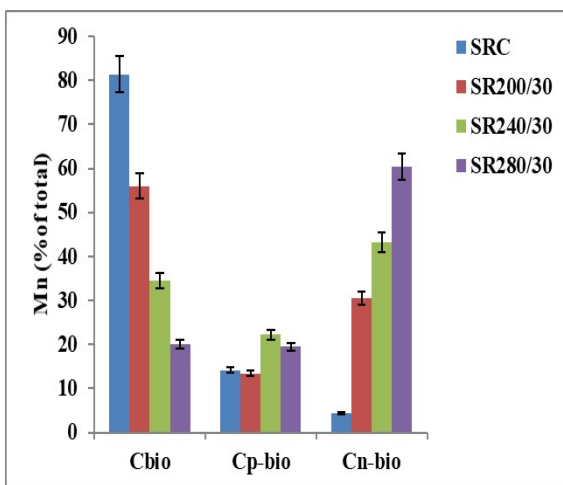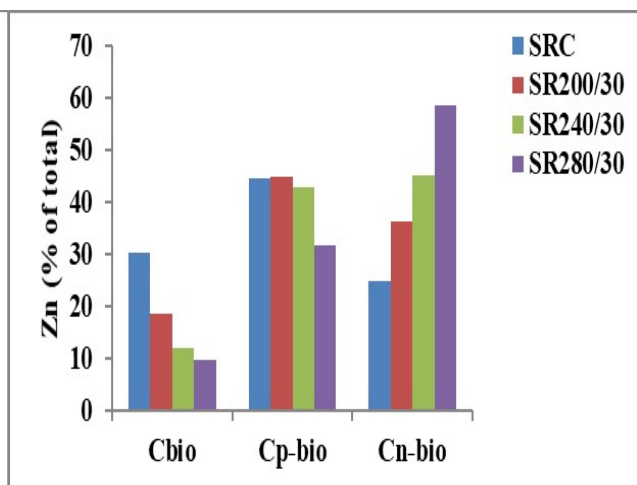

**Fig. S4.** Distribution of heavy metals, Cr, Cu, Fe, Pb, Mn, and Zn in bio-available ( $C_{\text{bio}}$ ), potential bio-available ( $C_{\text{P-bio}}$ ), and non-bio-available ( $C_{\text{N-bio}}$ ) fractions before and after SCW treatment.

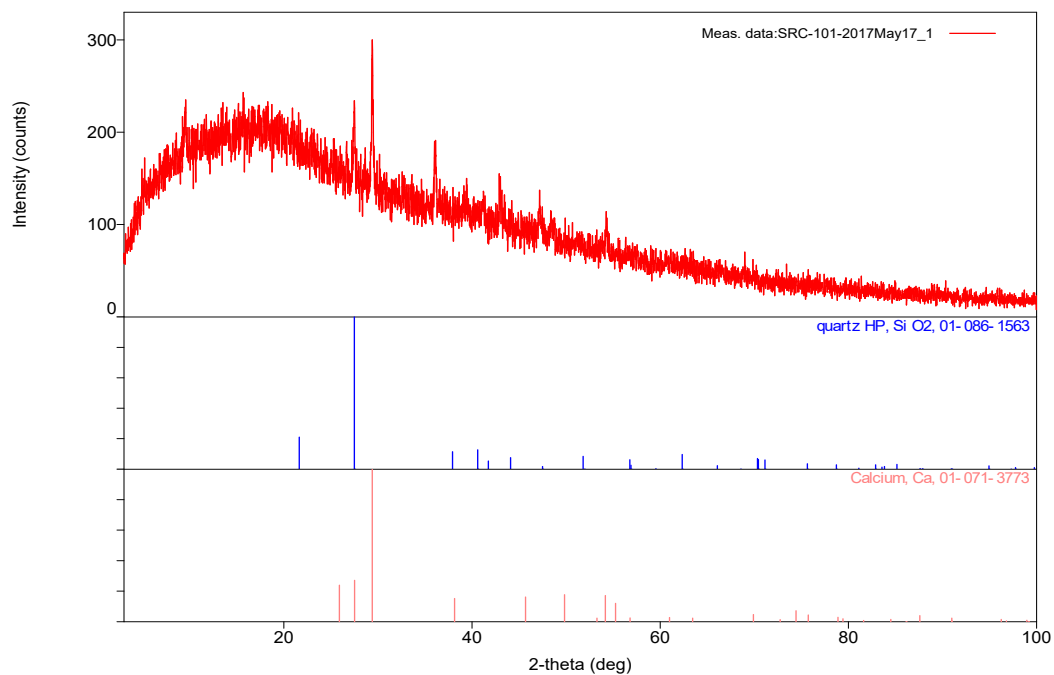

**Fig. S5.** XRD pattern of raw tannery sludge without SCW treatment (SRC).

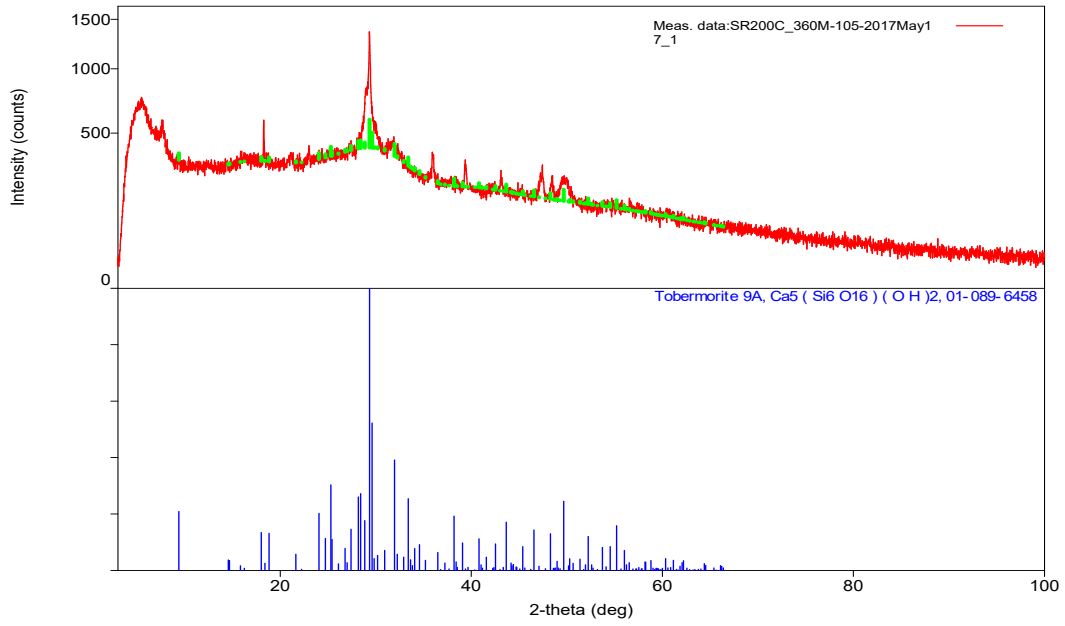

(a)

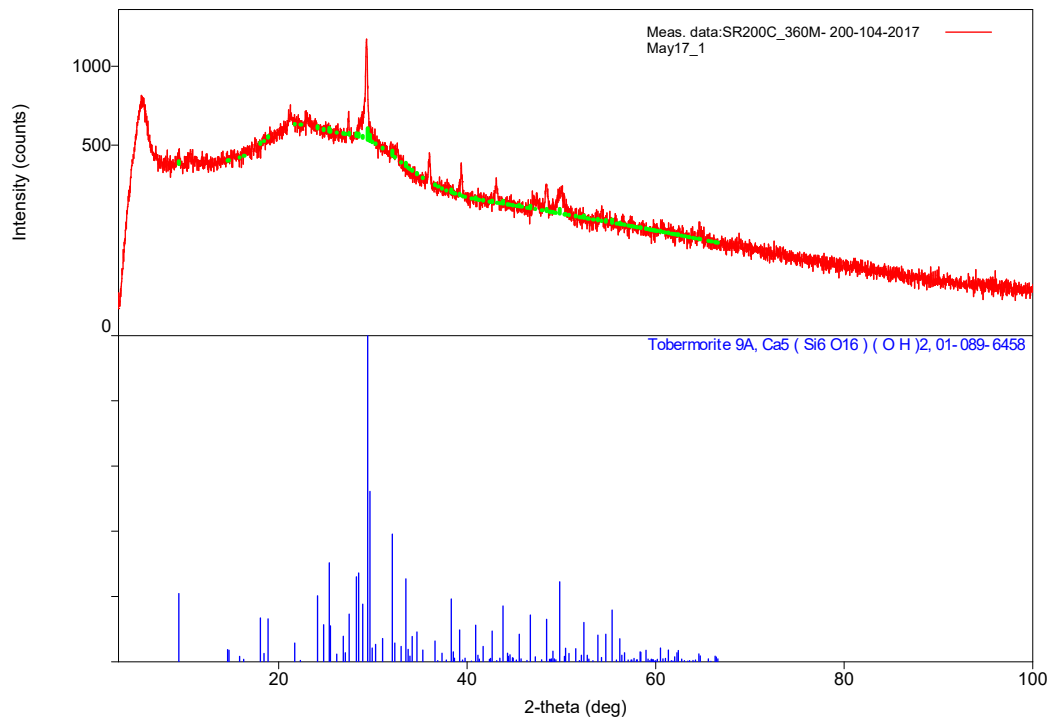

(b)



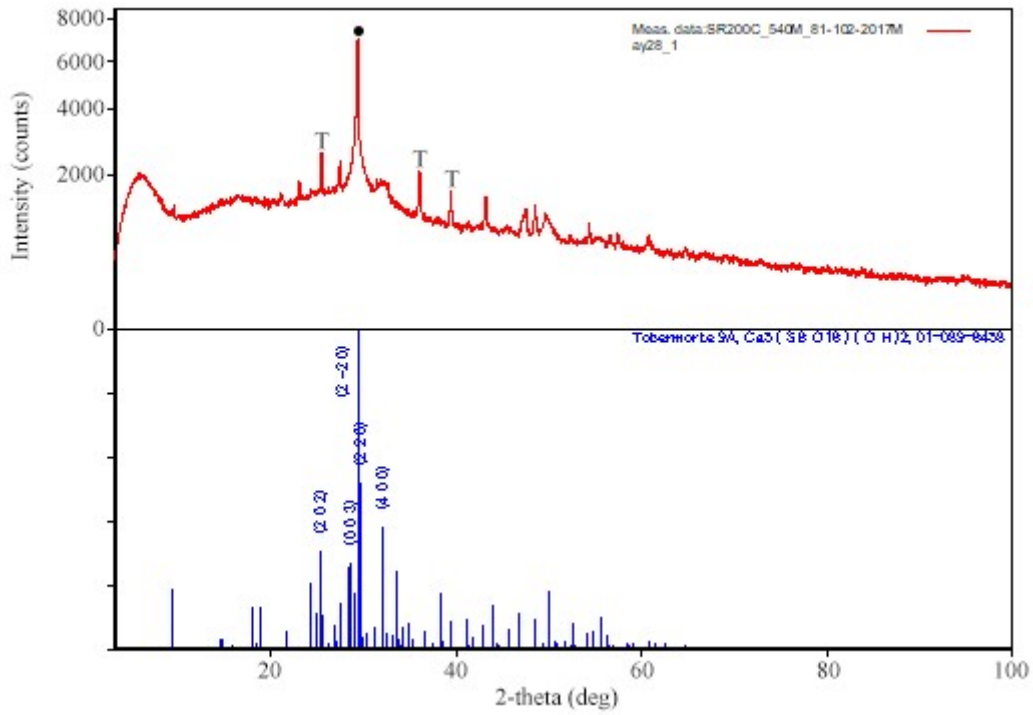

(c)

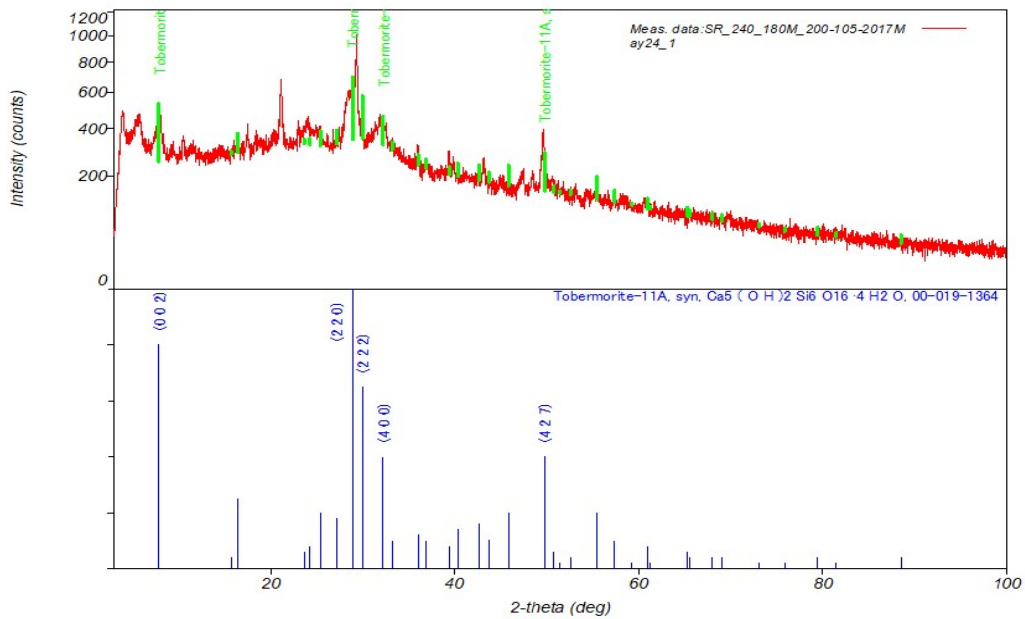

(d)

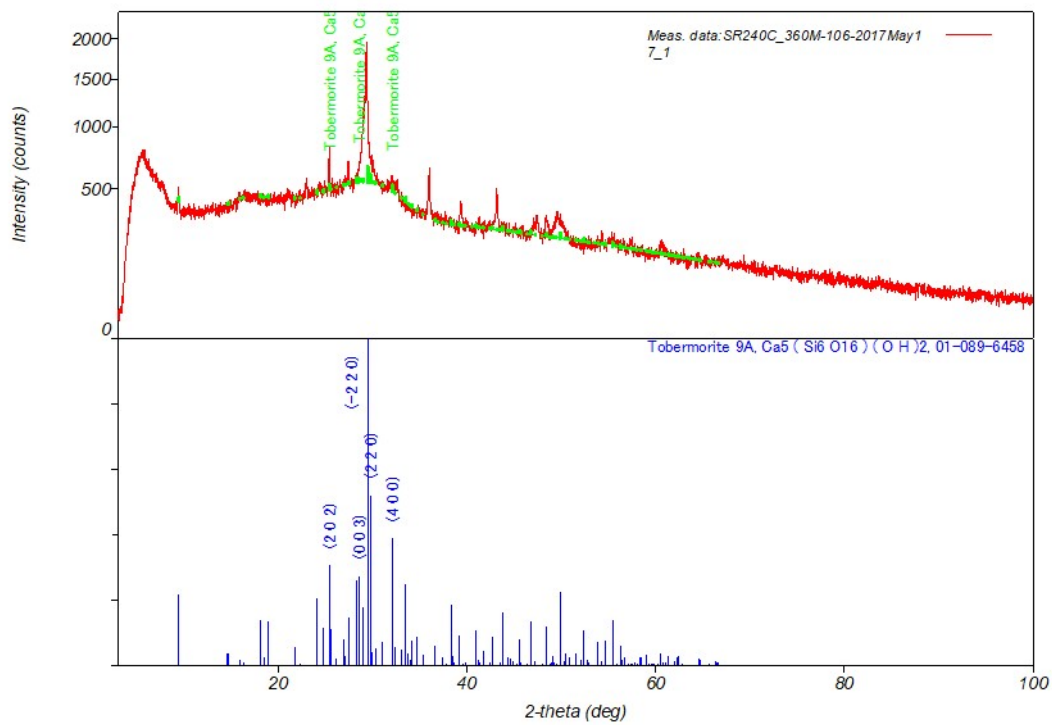

(e)

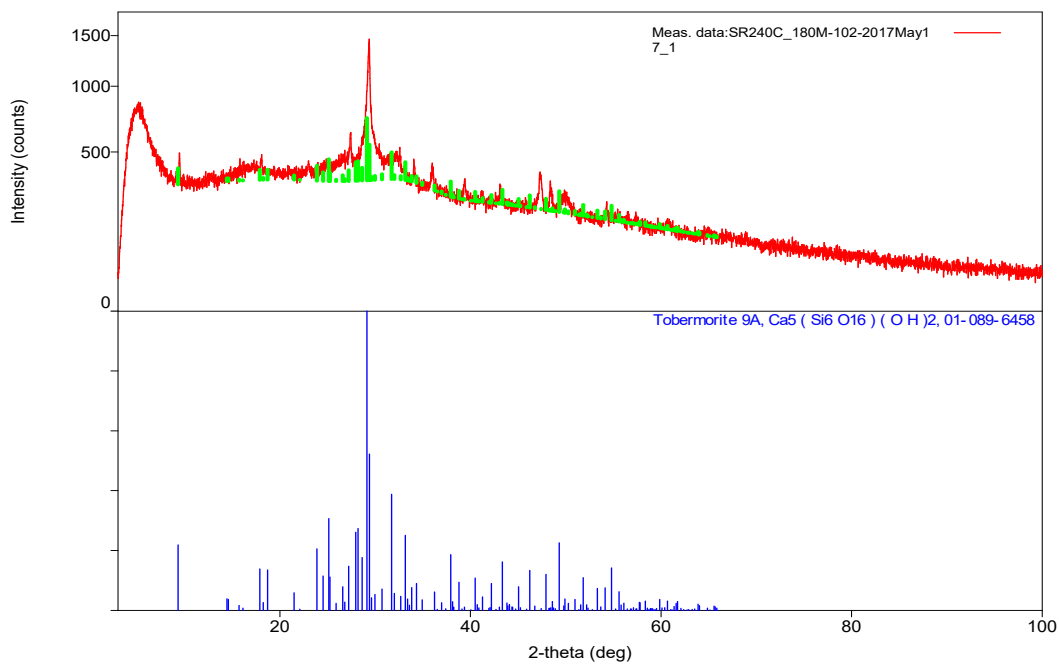

(f)

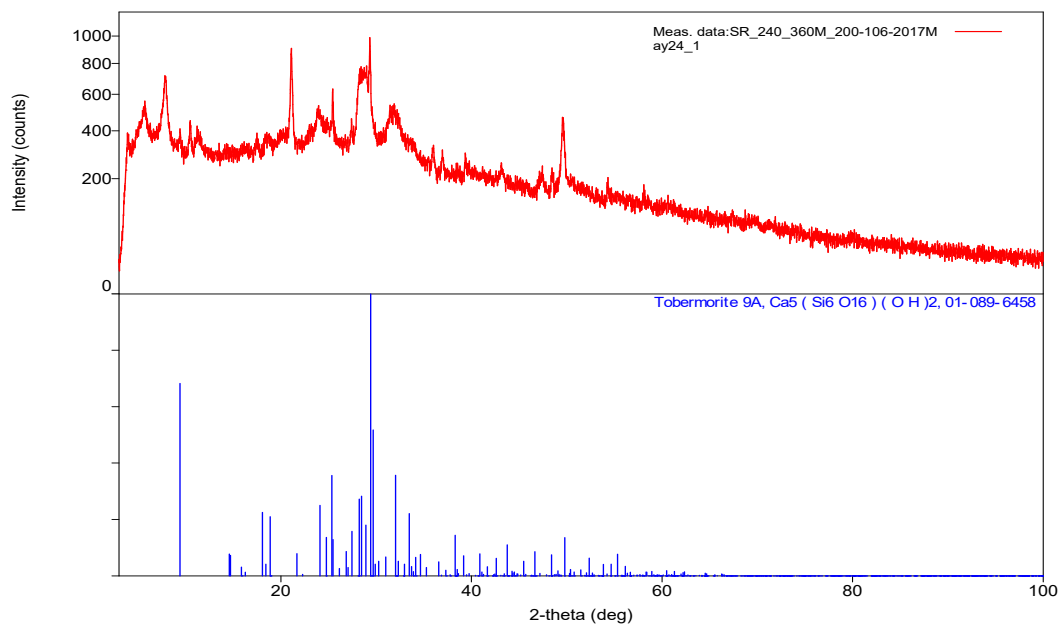

(g)

**Fig. S6.** XRD pattern of SCW-treated tannery sludge. A: SR200/360/S, B: SR200/360/D. XRD pattern of SCW treated solid portion. C: SR200/540/S, D: SR240/180/D, E: SR240/360/D, F: SR240/180/S, G: SR240/360/D.

## References

- [1] L. Li, Z.R. Xu, C. Zhang, J. Bao and X. Dai, *Bioresour. Technol.* **121**, 169-175 (2012).  
<https://doi.org/10.1016/j.biortech.2012.06.084>
- [2] A.A. Peterson, F. Vogel, R.P. Lachance, M. Fröling, M.J. Antal and J.W. Tester, *Energ. Environ. Sci.* **1(1)**, 32-65 (2008).
